1 **Fecal microbiota transplantation brings about bacterial strain**  
2 **displacement in patients with inflammatory bowel diseases**

3

4 Manli Zou<sup>1,2\*</sup>, Zhuye Jie<sup>2,3,4\*</sup>, Bota Cui<sup>5\*</sup>, Honggang Wang<sup>5</sup>, Qiang Feng<sup>2,3,6,7,8</sup>, Yuanqiang Zou<sup>2,3</sup>,

5 Xiuqing Zhang<sup>1</sup>, Huanming Yang<sup>2,9</sup>, Jian Wang<sup>2,9</sup>, Faming Zhang<sup>†5</sup>, Huijue Jia<sup>†2,3,4,11</sup>

6 1. BGI Education Center, University of Chinese Academy of Sciences, Shenzhen 518083

7 China;

8 2. BGI-Shenzhen, Shenzhen 518083, China;

9 3. China National Genebank, Shenzhen 518083, China;

10 4. Shenzhen Key Laboratory of Human Commensal Microorganisms and Health Research,

11 BGI-Shenzhen, Shenzhen 518083, China;

12 5. Medical Center for Digestive Disease, the Second Affiliated Hospital of Nanjing Medical

13 University, 121 Jiang JiaYuan, Nanjing 210011, China;

14 6. Shenzhen Engineering Laboratory of Detection and Intervention of Human Intestinal

15 Microbiome, Shenzhen 518083, China;

16 7. Department of Biology, Laboratory of Genomics and Molecular Biomedicine, University of

17 Copenhagen, Universitetsparken 13, 2100 Copenhagen, Denmark;

18 8. Present address: Department of Human Microbiome, School of Stomatology, Shandong

19 9. James D. Watson Institute of Genome Sciences, Hangzhou 310058, China;

20 10. Key Lab of Holistic Integrative Enterology, Nanjing Medical University, Nanjing 210011,

21 China.

22 11. Macau University of Science and Technology, Taipa, Macau 999078, China;

23 \*These authors have contributed equally to this study

24 †Corresponding authors: Faming Zhang, MD, PhD, Medical Center for Digestive Diseases,  
25 the Second Affiliated Hospital of Nanjing Medical University, 121 Jiang JiaYuan, Nanjing  
26 210011, China. Tel.: +86-25-58509883; Fax: + 86-25-58509931.

27 E-mail: fzhang@njmu.edu.cn

28

29

30

31

32

33

34

35

36

37

38

39

40

41

42

43

44

45

46 **ABSTRACT**

47 Fecal microbiota transplantation (FMT), which is thought to have the potential to  
48 correct dysbiosis of gut microbiota, has recently been used to treat inflammatory bowel  
49 disease (IBD). To elucidate the extent and principles of microbiota engraftment in IBD  
50 patients after FMT treatment, we conducted an interventional prospective cohort study.  
51 The cohort included two categories of patients: (1) patients with moderate to severe  
52 Crohn's disease (CD) ( Harvey-Bradshaw Index  $\geq 7$ , n = 11, and (2) patients with  
53 ulcerative colitis (UC) (Montreal classification, S2 and S3, n = 4). All patients were  
54 treated with a single FMT (via mid-gut, from healthy donors) and follow-up visits were  
55 performed at baseline, 3 days, one week, and one month after FMT (missing time  
56 points included). At each follow-up time point, fecal samples of the participants were  
57 collected along with their clinical metadata. For comparative analysis, 10 fecal samples  
58 from 10 healthy people were included to represent the diversity level of normal gut  
59 microbiota. Additionally, the metagenomic data of 25 fecal samples from 5 individuals  
60 with metabolic syndrome who underwent autologous FMT treatment were downloaded  
61 from a previous published paper to represent natural microbiota shifts during FMT. All  
62 fecal samples underwent shotgun metagenomic sequencing.

63 We found that 3 days after FMT, 11 out of 15 recipients were in remission (3 out of 4  
64 UC recipients; 8 out of 11 CD recipients). Generally, bacterial colonization was  
65 observed to be lower in CD recipients than in UC recipients at both species and strain  
66 levels. Furthermore, across species, different strains displayed disease-specific

67 displacement advantages under two-disease status. Finally, most post-FMT species (>  
68 80%) could be properly predicted (AUC > 85%) using a random forest classification  
69 model, with the gut microbiota composition and clinical parameters of pre-FMT  
70 recipients acting as the most contributive factors for prediction accuracy.

71 **KEYWORDS** : shotgun metagenomic sequencing; Inflammatory bowel disease; fecal  
72 microbiota transplantation; strain level identification; strain displacement; random  
73 forest

74

75

76

77

78

79

80

81

82

83

84

85

86

87

88

89

90

## 91 INTRODUCTION

92 Inflammatory bowel disease (IBD) is a chronic inflammatory disease characterized by  
93 chronic immune-mediated intestinal inflammation, and consists mainly of Crohn's  
94 disease (CD) and ulcerative colitis (UC). The etiology of IBD has been proposed to be  
95 multifactorial, involving a dysregulated immune response to environmental factors in a  
96 genetically susceptible individual (1). Interestingly, given the evidence accumulated in  
97 recent years, the gut microbiota is now recognized for playing an important role in IBD.  
98 Dysbiosis is a decrease in gut microbial diversity owing to a shift in the balance  
99 between commensal and potentially pathogenic microorganisms of the gut microbial  
100 ecosystem, and has long been characterized as a trait of IBD patients (2,3).

101 Fecal microbiota transplantation (FMT) aims to modify the intestinal microbiota  
102 composition and function of the recipients by transferring donor fecal suspension into  
103 the gastrointestinal tract of a recipient, and has become a promising method for  
104 manipulating the gut microbiota. Its successful application for the treatment of  
105 *Clostridium difficile* infection has inspired people to apply it to inflammatory bowel  
106 disease patients (4,5,6,7,8,9). However, this application is still in its early stages.  
107 According to a recent systematic review and meta-analysis, after minimizing  
108 publication bias, IBD patients who received FMT had a remission rate of only 36.2%:  
109 22% for UC and 60.5% for CD (10). Moreover, there is a lack of research regarding  
110 the efficiency and principles of FMT in treating IBD.

111 Clinical research to date has focused more on UC (7,8,9), and there has been  
112 insufficient research on the effects of FMT on CD patients, with only a few case  
113 reports and small-scale case series reported (11,12,13,14). In addition, the majority of  
114 studies conducted so far to investigate the role FMT plays in treating IBD have used  
115 16S rRNA sequencing, which has limited resolution on taxonomic and functional  
116 classification of sequences. Contradictory results were often observed at species-level  
117 resolution, making it hard to determine the exact role of different bacterial agents. For  
118 instance, the abundance of *Faecalibacterium prausnitzii* was found to decrease in one  
119 study and to increase in another (15,16). Thus, it is necessary to be able to appreciate  
120 the whole composition of gut microbiota at a strain level. Strain level variants within  
121 microbial species are crucial in determining their functional capacities within the  
122 human microbiome, such as interaction with host tissues (17), modulation of immune  
123 homeostasis (18), and xenobiotic metabolism (19). Shotgun metagenomic sequencing  
124 with the ability to target all DNA material in a sample can give a base pair level  
125 resolution of the genome that makes single nucleotide analysis possible. Additionally,  
126 promising machine learning methods could enable the establishment of predictive  
127 models to predict the microbiota composition of post-FMT recipients. Recently, S.  
128 *Smillie* et al. constructed a machine learning model to predict the species profile of  
129 post-FMT recipients for 18 *C. difficile* patients and found that bacterial abundance and  
130 phylogeny were the strongest determinants of engraftment (20). In our study, we utilize  
131 a random forest model to predict the mOTUs profile of IBD recipient 3 days after FMT  
132 and identified the variables that contribute most to model prediction accuracy.

133

134

## 135 **MATERIALS AND METHODS**

### 136 **Patient recruitment and sample collection**

137 Patients aged 19–64 years were recruited from the Second Affiliated Hospital of  
138 Nanjing Medical University, China from 2012 to 2014. The dataset was composed of  
139 10 fecal samples from 10 healthy people, among which 6 were FMT donors, and 34  
140 fecal samples from 15 IBD patients. Donor fecal samples were collected prior to FMT.  
141 Stool samples from recipients were collected at baseline, day 3, and day 7 (or day 30)  
142 (Figure 1). Missing points were due to patient discharge. Detailed standards of patient  
143 recruitment and donor screening were previously published (13). Donors were either  
144 related (genetically related family members) or unrelated (screened unrelated family  
145 members). Clinical metadata of IBD patients—including anthropometric index, clinical  
146 parameters, and blood test results—were obtained at each follow-up time point. For  
147 autologous FMT treatment, 25 additional fecal samples from 5 metabolic syndrome  
148 individuals were obtained from the *Vrieze et al.* (21) study with follow-up points on  
149 day 0 and days 2, 14, 42, and 84 after FMT.

150 In summary, 34 samples were used for analysis of the allogenic FMT group, 25 for the  
151 autologous, and 10 for the healthy group.

### 152 **Stool sample collection and FMT procedure**

153 Fecal samples were obtained from scanned donors and were isolated for microbiota at  
154 lab. Fecal microbiota from the donor was prepared according to the manual method of

155 filtration, centrifugation, washing, discarding, and resuspension and repeated processes.  
156 Purified fresh fecal microbiota suspension was input into patients' mid-gut by a tube  
157 within gastroscope under anesthesia, and the entire procedure should be done within  
158 one hour.

### 159 **Metagenomic sequencing and processing methods**

160 DNA extraction and metagenomic sequencing of IBD fecal samples and healthy fecal  
161 samples were performed at BGI-Shenzhen, China following HiSeq 2000 sequencing  
162 protocol. Metagenomic sequencing of autologous FMT treatment samples was  
163 performed at the Genomics Core Facility of the European Molecular Biology  
164 Laboratory, Heidelberg using Hiseq 2000.

165 Illumina sequencing reads were quality controlled by trimming low quality bases  
166 (quality score < 20), filtering adapter reads, and removing host-related reads after  
167 mapping to the human genome database. The reads quality control procedure was  
168 conducted using cOMG with default parameters (22). After quality control,  
169 1,379,430,125 sequences were obtained, with a mean of 31,350,685 sequences per  
170 sample.

### 171 **Microbiota taxonomic profiling**

172 Species-level quantification of metagenomic sequencing reads was achieved using  
173 mOTUs software with default parameters. mOTUs is a method that establishes  
174 metagenomic operational taxonomic units based on single-copy phylogenetic marker  
175 genes. It maps the quality-controlled metagenomic sequencing reads against the  
176 m-OTUS.v1.padded database, which is composed of 10 MGs extracted from 3,496



177 prokaryotic reference genomes (download from NCBI) and 263 publicly available  
178 metagenomes (from the MetaHIT and HMP projects), and then outputs metagenomic  
179 OUT linkage groups (m-OTUS) (23).

180 For strain level profiling, metaSNV was utilized to process quality-controlled  
181 metagenomic sequencing reads. metaSNV is a method that is able to disentangle  
182 conspecific strains in metagenomic samples using specific single-site allelic variation  
183 (SNVs). It uses a collection of microbial reference genomes in which each species is  
184 represented by a single representative genome or gene collection (24). To maintain  
185 consistency with previous species profiles, we specified the m-OTUS.v1.padded  
186 database as our reference genome or gene collection during this procedure. First, we  
187 mapped quality-controlled sequencing reads to the m-OTUS.v1.padded database using  
188 bwa and Ngless. Next, we ran qaCompute on each sample to determine the average  
189 coverage over each reference in each sample and aggregated the coverage information.  
190 We then took advantage of the mpileup tool to compute genomic variation, and  
191 outputted all the variant positions that met the default-imposed quality criteria. Lastly,  
192 we computed per species pairwise distance matrices for the samples.

### 193 **Quantification and Statistical Analysis**

194 All statistical analyses were performed in R using the following packages: vegan,  
195 Hmcc, pROC, and RandomForest. We conservatively used only the baseline and day 3  
196 time point samples for each patient when conducting all the two-sided statistical tests.

197 ***Diversity comparisons.*** The diversity of each gut microbiota community per sample  
198 was calculated based on its mOTUs profile, referred to as the Shannon index, using the

199 vegan package. The Kruskal-Wallis test was used as a significance test for this  
200 multi-group comparison.

201 ***Species-level changes after FMT.*** After species profiling all fecal samples using  
202 mOTU, we took only the species with a detected relative abundance of at least 0.001  
203 into account to avoid ambiguous results. In order to determine whether donor  
204 microbiota could be transferred to recipients, we divided the microbiota composition of  
205 post-FMT recipient into 4 groups: donor-specific species, recipient-specific species,  
206 common species (shared by donor and recipient), and new species (not found in either  
207 the donor or in the pre-FMT recipient). We quantified these 4 groups by comparing the  
208 gut microbiota mOTU profiles of the pre-FMT recipient, the post-FMT recipient, and  
209 the donor. Results were visualized using bar plots with all available follow-up time  
210 points.

211 ***Community-level changes after FMT.*** Community-level changes in gut microbiota  
212 composition between pre-FMT and post-FMT recipients were represented by the  
213 Bray-Curtis distance, which was computed using the vegan package after applying a  
214 logarithmic transformation to mOTU relative abundance with the function  $\log(x+x_0)$ ,  
215 where  $x$  is the original relative abundance of a certain mOTU and  $x_0 = 1e-6$ . The cosine  
216 dissimilarity was also used to examine the correlations between gut microbiota  
217 compositions pre-FMT and post-FMT, and between post-FMT recipients and donors.  
218 Results were displayed using scatter plots.

219 ***Strain-level changes after FMT.*** Strain differentiation, which was determined by  
220 comparing the presence or absence of donor-specific, recipient-specific, and previously

221 undetected single-site allelic variations, was monitored in post-FMT recipients based  
222 on the output files of metaSNV. Similar to the process of determining species retention  
223 and transplantation, the gut microbiota composition of post-FMT recipients was  
224 categorized into 3 groups: donor-specific strains, recipient-specific strains, and  
225 common strains (shared by donor and recipient). We excluded the newly gained strains  
226 because that was not of interest here. Quantification of the three groups was  
227 determined according to the frequency per filtered SNVs set.

228 *Species engraftment model.* We sought to investigate whether the microbiota  
229 composition of post-FMT recipients could be predicted using advanced machine  
230 learning models. We therefore applied the Random Forest algorithm in R to predict the  
231 presence (random forest classification model) and abundance (random forest regression  
232 model) of each mOTU in every post-FMT recipient sample. For a dataset comprised of  
233 15 samples and 123 filtered mOTUs, these models are trained on 15 x 127 total  
234 instances. The inputs for these predictions are the gut microbiota composition of each  
235 pre-FMT patient and their corresponding donor at a species level, along with clinical  
236 metadata of the pre-FMT recipient and donor. Random Forest is a collection or  
237 ensemble of classification and regression trees trained on targeted datasets. It is  
238 resistant to overfitting and is considered stable in the presence of outliers. The error  
239 rate of the classification of all the test sets is the out-of-bag (OOB) estimate of the  
240 generalization error (25).

241 First, we eliminated the condition of class imbalances by filtering out mOTUs that  
242 existed in less than 3 samples to avoid prediction bias in favor of the majority class.

243 Second, the mtry parameter with the lowest error was picked using the rfcv function  
244 with 5-fold cross validation. Third, we applied the randomForest function to perform  
245 classification of post-FMT recipients across all mOTUs. This resulted in 123  
246 randomForest classification models in total, and we computed the auc value for each  
247 model. Finally, we chose important features from those models that had good  
248 prediction performance (auc bigger than 0.9).

249 For the regression model, we also accounted for class balance and then used the rfcv  
250 function with the same predictors that we used in the classification model to perform  
251 prediction.

252 ***Feature Importance.*** Random Forest calculates feature importance by removing each  
253 feature from the model and measuring the decrease in accuracy (for presence) or the  
254 increase in the mean-square error (for abundance). According to these importance  
255 scores, we ranked features in decreasing order across models and picked 40 with the  
256 highest scores to display.

257 ***Correlations between change in mOTUs as well as in clinical parameters.*** Clinical  
258 metadata of patients was collected at baseline and follow-up visits, including physical  
259 parameters, inflammation markers, lymphocyte population, blood fat, and  
260 immunoglobulin. We used the rcorr function in the Hmisc package to compute the  
261 spearman correlation iterating from each mOTU-clinical index pair. The change in  
262 each mOTU was defined as the increase or decrease in its relative abundance 3 days  
263 after FMT treatment compared to baseline. Changes in clinical index were computed  
264 based on the absolute score recipients got at baseline and 3 days after FMT treatment.

265 For multiple comparisons, the Benjamini-Hochberg method was used to adjust the p  
266 value to control for false positives. Lastly, we drew a network using Cytoscape based  
267 on the pairs with a q-value smaller than 0.05 (26).

268

269 Ethical statement

270 *This study was carried out in accordance with the recommendations of good clinical*  
271 *research practice (GCP), the Ethical committee of the Second Affiliated Hospital of*  
272 *Nanjing Medical University, and BGI-IRB. The protocol was approved by the Ethical*  
273 *committee of the Second Affiliated Hospital of Nanjing Medical University and*  
274 *BGI-IRB. All subjects gave written informed consent in accordance with the*  
275 *Declaration of Helsinki.*

276

## 277 **RESULTS**

### 278 **Bacteria characterization at a species level**

279 After profiling sequenced fecal samples using shotgun metagenomics, the Shannon  
280 index (alpha diversity of a community) of gut microbiota was measured across IBD  
281 recipients. Results showed that the average Shannon index of CD patients was  
282 significantly lower than that of healthy controls (P-value = 0.0035). In UC patients,  
283 although their Shannon index was lower than the average in healthy controls, dysbiosis  
284 was not significant (p-value = 0.57). Three days after FMT treatment, the average  
285 Shannon indexes of both CD and UC recipients had not significantly improved

286 (p-value > 0.01) (Figure 2A). Unexpectedly, CD-6, CD-7, CD-8, and UC-2 had a  
287 decreased Shannon index.

288 Among the whole population of the gut microbiota, some bacteria may be more  
289 important than others for maintaining a healthy gut environment. For example, 3 days  
290 after FMT treatment, there was a universal increase in *Bacteroides* that have been  
291 shown to exist at lower levels in IBD patients than in healthy people (27). Some highly  
292 individualistic performances were also observed: CD-9 gained an abundant amount of  
293 *Lactobacillus*, which was considered to be probiotics, and CD-1 had a great decrease in  
294 *Citrobacter*, which was recognized to be pathogenic bacteria (Figure 2B). The amounts  
295 of species each recipient gained from their donor after FMT are shown in Figure S1.

#### 296 **Bacterial engraftment at the species level**

297 To investigate the extent to which the gut microbiota of recipients could be altered by  
298 FMT treatment, we evaluated both the degree and direction of change. Results showed  
299 that microbial communities underwent large compositional changes after FMT, and  
300 these changes persisted throughout follow-up visits (Figure 2B).

301 On average, post-FMT CD recipients gained 29.4% of mOTUs from donors (n = 11,  
302 SD = 14.4%), while post-FMT UC recipients gained 28.2% of mOTUs from donors (n  
303 = 4, SD= 20%). Our results were analogous to a previous study that found that FMT  
304 recipients gained 35% of mOTUs from donors (n = 436, SD = 27%) (28).

305 By measuring the distance between donor-recipient pairs using Euclidean distance, we  
306 determined the direction of microbiota change. Results varied between different  
307 donor-recipient pairs. Out of the 4 patients that had 2 follow-up time points, we found

308 that CD-9 and UC-2 tended to be closer to their donors and further from their pre-FMT  
309 status. CD-2 showed a slightly tendency to return to their initial status, but the  
310 disturbance was small enough to be ignored (a shift from 10.628 to 10.57).  
311 Surprisingly, CD-1 showed an increased distance from both their donor and their  
312 pre-FMT status, which could be attributed to environmental factors. Though CD-1,  
313 CD-2, and UC-2 all shared the same donor, the direction of their gut flora shift after the  
314 treatment varied (Figure 3A). In addition, we explored the abundance consistency of  
315 mOTUs of recipients before and after FMT. mOTUs of the recipient post-FMT were  
316 highly correlated with mOTUs of the recipient pre-FMT (median cosine similarity of  
317 UC patient mOTUs = 0.93, CD patients = 0.95). More importantly, the results showed  
318 that mOTUs of post-FMT recipients had high similarity to mOTUs of their donors  
319 (median cosine similarity of UC patient mOTUs = 0.95, that of CD patients = 0.91)  
320 (Figure 3B).

### 321 **Bacterial engraftment at the strain level**

322 To investigate the extent of strain level changes in our study groups, we monitored  
323 SNVs identified at baseline over all available time points. Higher levels of single-site  
324 allelic variations were observed in UC FMT recipients and CD FMT recipients  
325 compared to autologous FMT recipients from a previous paper (21) ( $P = 0.0056$  and  
326  $0.148$ , respectively). Moreover, SNVs were found to be higher in UC FMT recipients  
327 than in CD FMT recipients ( $P = 0.070$ ) (Figure 4).

328 To investigate whether this increased variation was due to the transfer and  
329 establishment of donor microbiota, we followed methods described in a previously

330 published paper (28), defining a set of determinant genomic positions (containing both  
331 donor- and recipient-specific SNVs) and monitoring them over time (Figure 5). For the  
332 credibility of SNVs detection, we chose species with sufficient abundance that were  
333 consistently detected in at least one donor-recipient pair. Donor-specific SNVs were  
334 most highly retained 3 days after FMT (UC:  $62.8 \pm 25.3\%$  of determinant positions  
335 across recipients, CD:  $11.4 \pm 10.3\%$ ) and were still present 1 month later (UC: 46.9%,  
336 CD:  $19.99 \pm 10.1\%$ ). This was in contrast with the much lower rates of variation  
337 observed at equivalent time points in autologous FMT recipients ( $9.5 \pm 1.8\%$ ) (Figure  
338 S1), showing that the increased variations of gut microbiota in post-FMT patients  
339 could be attributed to donor strain transfer instead of temporal variability.

340 Furthermore, marked differences in colonization success were observed between UC  
341 and CD recipients who shared a donor (subjects CD-1,2,3,8, and UC-1,2). 3 days after  
342 treatment, UC-1,2 retained a higher amount of donor-specific SNVs compared to  
343 CD-1,2,3,8 (48.9%, 44.4%, 11.9%, 3.4%, 1.5%, and 9.3%, respectively). Extensive  
344 coexistence of donor and recipient strains (CD: in  $44.1 \pm 17.1\%$  of shared species, UC:  
345  $21.3 \pm 14.1\%$ ) was found in all other recipients, and persisted for at least one month.  
346 This suggests that novel strains can colonize the gut without replacing the indigenous  
347 strain population of the recipient. It appeared that introduced strains were more likely  
348 to be established in a new environment if the species was already present, and a pattern  
349 of donor strains establishing alongside indigenous strains of the recipient was observed.

350 While the phenomenon of donor strain establishment occurred in both CD and UC  
351 recipients, UC patients were more susceptible to external sources of microbiota (Figure



352 6).

353 Donor strains showed different transferability under different disease status.  
354 Donor-specific strains like *Ruminococcus torques* ATCC 27756, *Ordoribacter*  
355 *splanchnicus* DSM 20712, *Klebsiella pneumoniae* 342, *Intestinaibacter bartlettii* DMS  
356 16795, *Escherichia coli* O26:H11 str. 11368, and *Erysipelatoclostridium ramosum*  
357 DSM 1402 only exerted strain displacement in CD patients, while donor-specific  
358 strains like *Faecalibacterium prausnitzii* SL3/3, *Eubacterium ventriosum* ATCC 27560,  
359 *Blautia obeum* A2-162, *Bifidobacterium longum* subsp. *infantis* ATCC 15697 = JCM  
360 1222 = DSM 20088, *Anaerostipes hadrus*, and *Eubacterium rectale* M104/1 only  
361 exerted strain displacement in UC patients (Figure 5).

362 **Construction of a prediction model for gut microbiota composition of post-FMT**  
363 **patients**

364 According to what we have discovered in previous species-level analysis, microbiota  
365 of post-FMT recipients are a complex mixture of species from the donor, species from  
366 the recipient, and species gained from the environment. We speculated that after  
367 accounting for the gut microbiota composition of pre-FMT recipients and donors,  
368 along with the corresponding clinical metadata of the recipients, we might be able to  
369 predict the post-FMT gut microbiota of the recipients. We, therefore, performed  
370 random forest classification and regression analysis, which is non-linear and can accept  
371 categorical and continuous predictors simultaneously from our data (25).

372 To investigate whether species compositions of post-FMT patients—that is, the  
373 mOTUs profiles—were predictable, we first examined the presence of each mOTU

374 across post-FMT recipients using the randomForest classification model, and  
375 computed the average area under the curve (AUC) (mean = 74.2%, SD = 16%). We  
376 then utilized a randomForest regression model to test the predictability of abundance of  
377 each mOTU ( $\rho = 0.478$ ,  $P < 2.2e-16$ ). Results indicated that the presence of most  
378 (>80%) species of post-FMT recipients was highly predictable (AUC > 85%), while a  
379 small portion of species was not. The abundance of mOTUs of post-FMT recipients  
380 was moderately predictable (Figure 7A). Our results were poorer than a similar study  
381 conducted by Christopher S. Smillie et al. (20) on 19 R-CDI patients. One possible  
382 explanation for this discrepancy may be that they included other predictors in their  
383 model construction in addition to the ones we used: taxonomy, abundance, clinical  
384 metadata, sequencing depth, genome statistics, physiology, and resource utilization.  
385 The RandomForest model also provided an algorithm to rank the contribution of each  
386 predictor based on variable importance score. According to our analysis, among the top  
387 40 most important variables (see Materials & Methods), the IgA score, T-cell, and Th  
388 cell-induced of the recipients were the top three clinical-related elements.  
389 *Streptococcus.anginosus*, *Bacteroides.plebeius*, *Clostridium.bolteae*,  
390 *Streptococcus.thermophilus*, and *X.Ruminococcus.gnavus* were the top five species in  
391 the classification model (Figure 7B). In terms of species-related factors,  
392 *Streptococcus.anginosus* was reported to be associated with colorectal cancer and  
393 *Ruminococcus.gnavus* was found to be linked with a certain type of immunological  
394 rejection.

### 395 **Clinical outcomes**

396 Out of all 15 patients, 8 out of 11 CD patients and 3 out of 4 UC patients were relieved  
397 3 days after FMT treatment. Clinical improvement was defined as a decrease in the  
398 Harvey-Bradshaw Index  $> 3$  for CD, and a decrease in the Mayo score  $> 3$  for UC  
399 (Table S1).

#### 400 **Relationship between changes in clinical index and changes in gut microbiota**

401 Potential antigens in the microflora could have pro- or anti-inflammatory effects, and it  
402 could be argued that by reacting to these antigens, an organism is mounting an  
403 autoimmune response; by extension, the chronic mucosal inflammation of IBD could  
404 be thought of as an autoimmune disease. Given this perspective, it would make sense  
405 to relate the change in clinical parameters to the abundance change of gut microbiota in  
406 response to FMT treatment. We established the relationships between the change in  
407 clinical indexes as well as in mOTUs of recipients using Spearman's correlation. We  
408 found that defecation changes were significantly positively correlated with  
409 *Selenomonas.artemidis* and two unclassified species, and negatively correlated with  
410 *Enterococcus.casseliflavus* and *Prevotella.bivia*. Changes in CD4+CD8+, which have  
411 been identified to be higher in IBD patients than in normal people in previous studies,  
412 were significantly positively correlated with *Streptococcus.sp..C150*,  
413 *Streptococcus.infantis*, *Streptococcus.parasanguinis*, and *Streptococcus.australis*, and  
414 negatively correlated with changes in *Streptococcus.gordonii* and  
415 *Lactobacillus.salivarius*, a probiotic bacterium that lives in the gastrointestinal tract  
416 and has a range of therapeutic properties including suppression of pathogenic bacteria  
417 (29). Changes in TSC were significantly positively correlated with changes in

418 *Bacteroides fragilis*, which is found in most anaerobic infections and can promote the  
419 induction of type 1 T helper (TH1) cells, suppress IL-17 production, and improve  
420 experimental colitis (30). Additionally, we tested whether the physical characteristics  
421 of patients, such as BMI, age, and disease duration, (Table S2) could affect clinical  
422 outcomes. Changes in CD4+CD8+, Th.cell.Induced (counted by Flow cytometry), and  
423 abdominal pain score were found to significantly negatively correlate with the disease  
424 start age of patients ( $p < 0.05$ ), which could reflect disease duration. In addition,  
425 changes in CD4+CD8+ and Th.cell.Induced were significantly negatively correlated  
426 with the age of patients (when patients received FMT treatment). Disease duration and  
427 the age of patients were also discovered to be important features in the random forest  
428 classification model. As a result, we speculated that disease duration and age could be  
429 used as stratifying factors for IBD patients in future therapy plans (Figure 7B).

430

## 431 **DISCUSSION**

432 Consistent with previous findings, our study found reduced bacterial diversity in CD  
433 and UC patients. Strain level analysis monitored across samples revealed that 3 days  
434 after FMT treatment, a certain amount of species had noticeable strain replacements.  
435 Moreover, donor-specific strains belonging to different species demonstrated  
436 differentially competitive advantages during the process of displacement, measured by  
437 their relative abundance in recipients after FMT. We also observed that same-donor  
438 recipients undergo varying degrees of gut microbiome shifts, implying that the FMT  
439 treatment effect may be patient-specific, and raising the possibility of patient

440 stratification in clinical application.

441 We also aimed to identify factors that could contribute to the accurate prediction of  
442 post-FMT gut microbiota composition of the recipients. The moderate predictability of  
443 the classification and regression model suggests that the gut microbiota composition of  
444 post-FMT recipients can be recognized not through sequencing methods but through  
445 algorithms, indicating a promising future towards FMT precision treatment. In our  
446 model, we only take the species composition of the donor and pre-FMT patient, along  
447 with clinical indexes of the pre-FMT patient as predictors. There is space left to  
448 enhance the resolution of prediction accuracy. Based on previous studies concerning  
449 the etiology of IBD, factors like genetic background, non-bacterial components  
450 (virome, fungi), metabolites profile, and dietary records have the potential to account  
451 for the unexplainable part of our model.

452 Associations between immunological factors and clinical outcomes provide us with  
453 some limited but intriguing perspectives. CD4+CD8+, TSC, and Th.cell.Induced have  
454 been found to be associated with certain bacterial species, implying that bacteria have  
455 the potential to affect the adaptive immunity of patients. However, there are many  
456 intermediate issues to be dealt with before making a cohesive interpretation of this  
457 assumption. Combining the information from functional metagenomes and  
458 metabolomics will minimize the gap between gut microbiota and immunological  
459 responses of the recipients.

460 The present attractive clinical findings are mainly based on our one-hour FMT protocol  
461 for providing fresh FMT, which means the time from defecation of stool to deliver

462 purified microbiota to patient's intestine within one hour (31,32). Another factor  
463 contributing to this positive clinical response, according to our experience, might be  
464 the criteria of donor screening which is based on young age population, generally  
465 cover children and college students under 24-year-old (33). However, the small sample  
466 size of our study and the incomplete follow-up visits inevitably limited the scope of  
467 our results. Future studies need to include a larger study cohort and longer tracking  
468 times for the explicit identification of specific bacterial strains that may play a role in  
469 FMT treatment efficacy, and to uncover a comprehensive principle of strain  
470 displacement.

471

472 **Contributors:** Conceptualization, Methodology, and Writing – Zhuye Jie, Manli Zou,  
473 Bota Cui and Faming Zhang; Revision & Editing – Faming Zhang, Huijue Jia;  
474 Acquisition of data – Bota Cui, Honggang Wang, Qiang Feng; Materia Support –  
475 Yuanqiang Zou, Xiuqing Zhang, Huanming Yang, Jian Wang; Software and Formal  
476 Analysis, Manli Zou and Zhuye Jie; Writing – Original Draft, Manli Zou, and Zhuye  
477 Jie; Supervision, Faming Zhang and Huijue Jia.

478

479 **Disclaimer:** The authors declare that they have no competing interests and there is  
480 nothing to disclose.

481 **Competing interests:** None declared

482

483 **Funding:**

484 The work was financially supported by grants from the Macau Technology Developme  
485 nt Fund (102/2016/A3), the Shenzhen Municipal Government of China (JSGG2016022  
486 9172752028, JCYJ20160229172757249) and the National Natural Science Foundation  
487 of China (Grant No.81670606, 81670495).

488

489 **Patient consent:** Obtained

490

491 **Ethics approval:** This study was approved by BGI-IRB (BGI-R004-05)

492

493 **Availability of supporting data**

494 Datasets are in a publicly accessible repository:

495 The quality-controlled sequencing reads are available in the CNGB Nucleotide  
496 Sequence Archive (CNSA: <https://db.cngb.org/cnsa> ;accession number CNP0000134)

497

498

499

500

501

502

503 **REFERENCES AND NOTES :**

504 1. Khor, Bernard, Agnes Gardet, and Ramnik J. Xavier. "Genetics and pathogenesis of  
505 inflammatory bowel disease." *Nature* 474.7351 (2011): 307.

- 506 2. Manichanh C, Borruel N, Casellas F, et al. The gut microbiota in IBD[J]. Nature Reviews  
507 Gastroenterology and Hepatology, 2012, 9(10): 599.
- 508 3. Halfvarson J, Brislawn C J, Lamendella R, et al. Dynamics of the human gut microbiome in  
509 inflammatory bowel disease[J]. Nature microbiology, 2017, 2(5): 17004.
- 510 4. Borody T, Torres M, Campbell J, et al. Reversal of inflammatory bowel disease (IBD) with  
511 recurrent faecal microbiota transplants (FMT)[J]. American Journal of Gastroenterology,  
512 2011, 106.
- 513 5. Zhang F M, Wang H G, Wang M, et al. Fecal microbiota transplantation for severe  
514 enterocolonic fistulizing Crohn's disease[J]. World journal of gastroenterology: WJG, 2013,  
515 19(41): 7213.
- 516 6. Gutin L, Piceno Y, Fadrosch D, et al. Fecal microbiota transplant for Crohn disease: A study  
517 evaluating safety, efficacy, and microbiome profile[J]. United European Gastroenterology  
518 Journal, 2019: 2050640619845986.
- 519 7. Paramsothy, Sudarshan, et al. Multidonor intensive faecal microbiota transplantation for  
520 active ulcerative colitis: a randomised placebo-controlled trial. Lancet Lond Engl 2017;  
521 389: 1218–1228.
- 522 8. Moayyedi P, Surette M G, Kim P T, et al. Fecal microbiota transplantation induces remission  
523 in patients with active ulcerative colitis in a randomized controlled trial[J]. Gastroenterology,  
524 2015, 149(1): 102-109. e6.
- 525 9. Rossen N G, Fuentes S, van der Spek M J, et al. Findings from a randomized controlled  
526 trial of fecal transplantation for patients with ulcerative colitis[J]. Gastroenterology, 2015,  
527 149(1): 110-118. e4.



- 528 10. Colman R J, Rubin D T. Fecal microbiota transplantation as therapy for inflammatory bowel  
529 disease: a systematic review and meta-analysis[J]. *Journal of Crohn's and Colitis*, 2014,  
530 8(12): 1569-1581.
- 531 11. Angelberger S, Reinisch W, Makrithatis A, et al. Temporal bacterial community dynamics  
532 vary among ulcerative colitis patients after faecal microbiota transplantation[J]. *The*  
533 *American journal of gastroenterology*, 2013, 108(10): 1620.
- 534 12. Gordon H, Harbord M. A patient with severe Crohn's colitis responds to Faecal Microbiota  
535 Transplantation[J]. *Journal of Crohn's and Colitis*, 2014, 8(3): 256-257.
- 536 13. Cui B, Feng Q, Wang H, et al. Faecal microbiota transplantation through mid-gut for  
537 refractory Crohn's disease: Safety, feasibility, and efficacy trial results[J]. *Journal of*  
538 *gastroenterology and hepatology*, 2015, 30(1): 51-58.
- 539 14. Suskind D L, Brittnacher M J, Wahbeh G, et al. Faecal microbial transplant effect on  
540 clinical outcomes and faecal microbiome in active Crohn's disease[J]. *Inflammatory bowel*  
541 *diseases*, 2015, 21(3): 556-563.
- 542 15. Frank D N, Amand A L S, Feldman R A, et al. Molecular-phylogenetic characterization of  
543 microbial community imbalances in human inflammatory bowel diseases[J]. *Proceedings of*  
544 *the National Academy of Sciences*, 2007, 104(34): 13780-13785.
- 545 16. Hansen R, Russell R K, Reiff C, et al. Microbiota of de-novo pediatric IBD: increased  
546 *Faecalibacterium prausnitzii* and reduced bacterial diversity in Crohn's but not in ulcerative  
547 colitis[J]. *The American journal of gastroenterology*, 2012, 107(12): 1913.
- 548 17. Bron P A, Van Baarlen P, Kleerebezem M. Emerging molecular insights into the interaction  
549 between probiotics and the host intestinal mucosa[J]. *Nature Reviews Microbiology*, 2012,

550 10(1): 66.

551 18. Needham B D, Carroll S M, Giles D K, et al. Modulating the innate immune response by  
552 combinatorial engineering of endotoxin[J]. Proceedings of the National Academy of  
553 Sciences, 2013, 110(4): 1464-1469.

554 19. Spanogiannopoulos P, Bess E N, Carmody R N, et al. The microbial pharmacists within us:  
555 a metagenomic view of xenobiotic metabolism[J]. Nature Reviews Microbiology, 2016,  
556 14(5): 273.

557 20. Smillie C S, Sauk J, Gevers D, et al. Strain tracking reveals the determinants of bacterial  
558 engraftment in the human gut following faecal microbiota transplantation[J]. Cell host &  
559 microbe, 2018, 23(2): 229-240. e5.

560 21. Vrieze A, Van Nood E, Holleman F, et al. Transfer of intestinal microbiota from lean donors  
561 increases insulin sensitivity in individuals with metabolic syndrome[J]. Gastroenterology,  
562 2012, 143(4): 913-916. e7.

563 22. Fang C, Zhong H, Lin Y, et al. Assessment of the cPAS-based BGISEQ-500 platform for  
564 metagenomic sequencing[J]. GigaScience, 2017, 7(3): gix133.

565 23. Sunagawa S, Mende D R, Zeller G, et al. Metagenomic species profiling using universal  
566 phylogenetic marker genes[J]. Nature methods, 2013, 10(12): 1196.

567 24. Costea P I, Munch R, Coelho L P, et al. metaSNV: A tool for metagenomic strain level  
568 analysis[J]. PloS one, 2017, 12(7): e0182392.

569 25. Liaw A, Wiener M. Classification and regression by randomForest[J]. R news, 2002, 2(3):  
570 18-22.

571 26. Shannon P, Markiel A, Ozier O, et al. Cytoscape: a software environment for integrated

- 572 models of biomolecular interaction networks[J]. *Genome research*, 2003, 13(11):  
573 2498-2504.
- 574 27. Zhou Y, Zhi F. Lower level of bacteroides in the gut microbiota is associated with  
575 inflammatory bowel disease: a meta-analysis[J]. *BioMed research international*, 2016,  
576 2016.
- 577 28. Li S S, Zhu A, Benes V, et al. Durable coexistence of donor and recipient strains after faecal  
578 microbiota transplantation[J]. *Science*, 2016, 352(6285): 586-589.
- 579 29. Neville B A, O'Toole P W. Probiotic properties of *Lactobacillus salivarius* and closely related  
580 *Lactobacillus* species[J]. *Future Microbiology*, 2010, 5(5): 759-774.
- 581 30. Deng H, Li Z, Tan Y, et al. A novel strain of *Bacteroides fragilis* enhances phagocytosis and  
582 polarises M1 macrophages[J]. *Scientific reports*, 2016, 6: 29401.
- 583 31. Wang H, Cui B, Li Q, et al. The safety of fecal microbiota transplantation for Crohn's  
584 disease: Findings from a long-term study[J]. *Advances in therapy*, 2018, 35(11): 1935-1944.
- 585 32. Ding X, Li Q, Li P, et al. Long-Term Safety and Efficacy of Fecal Microbiota Transplant in  
586 Active Ulcerative Colitis[J]. *Drug safety*, 2019: 1-12.
- 587 33. Zhang F, Zhang T, Zhu H, et al. Evolution of fecal microbiota transplantation in methodology  
588 and ethical issues[J]. *Current opinion in pharmacology*, 2019, 49: 11-16.
- 589 34. Manli Z, Zhuye J, Bota C, et al. Bacterial strain displacement in inflammatory bowel  
590 diseases after fecal microbiota transplantation. *BioRxiv*, 2018,  
591 <https://doi.org/10.1101/439687>

592

593

594 **Additional files**

595 Tables S1; Table S2

596

597

598

599

600

601

602

603 **Figure legends**

604 **Figure 1. Study design and follow-up visits of the patients**

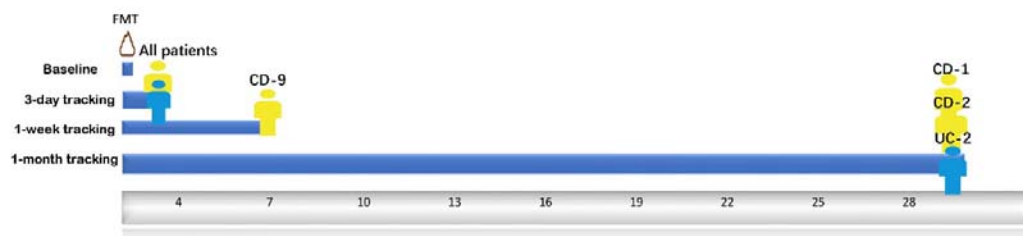

605

606 To recognize each patient in simplicity, we labeled each of them with disease subtypes

607 CD- or UC- as prefix plus a random assigned number as suffix.

608

609 **Figure 2. Bacterial communities undergo compositional changes in IBD recipients**  
610 **after FMT.**

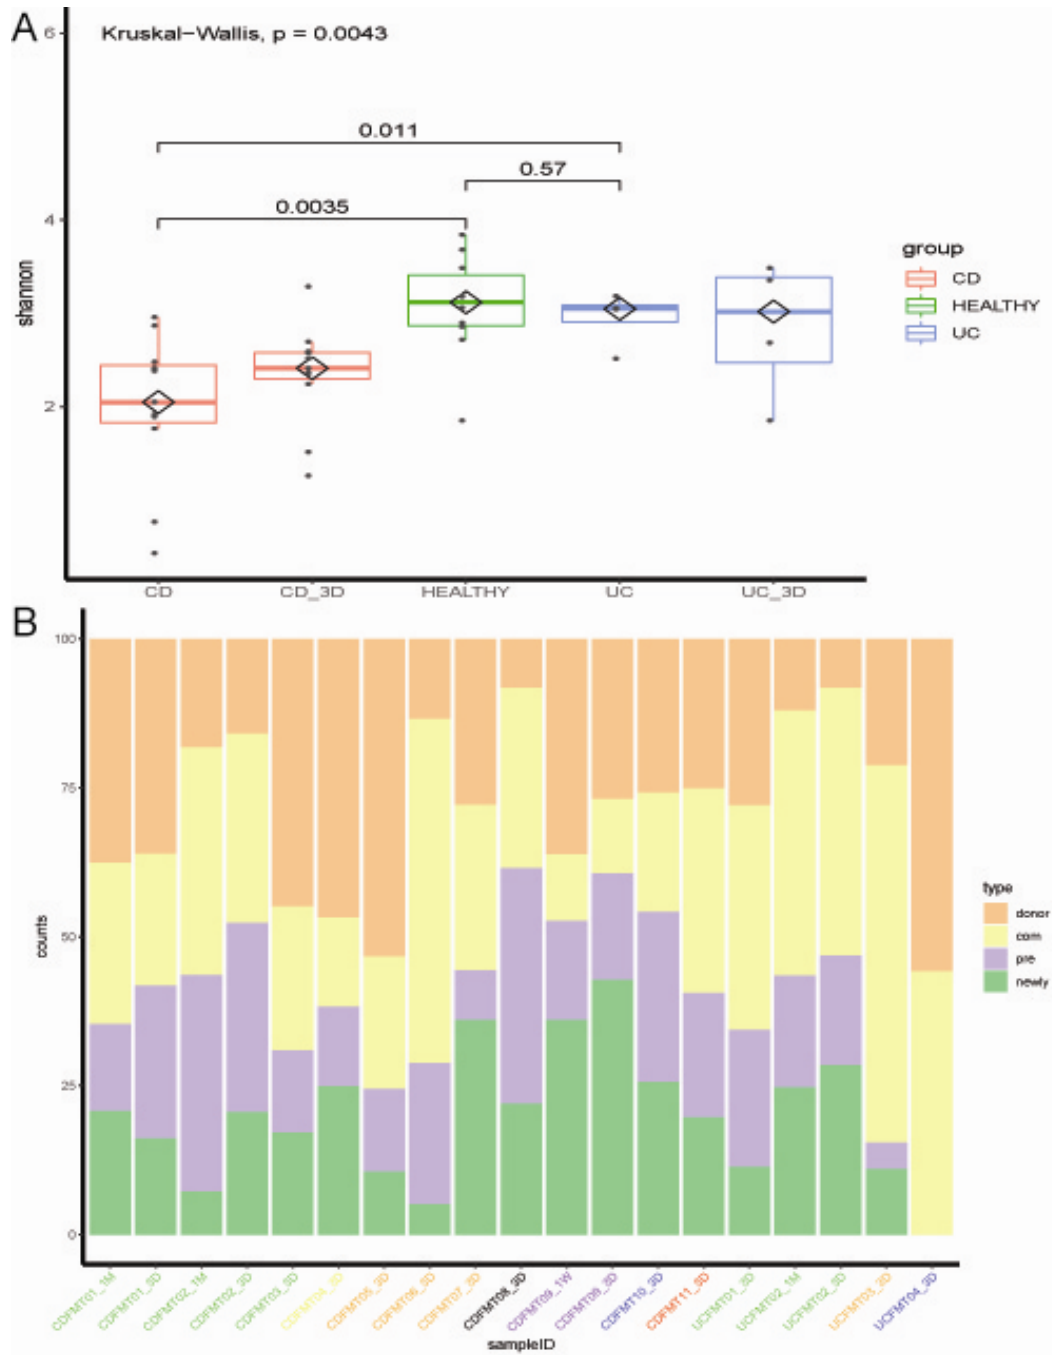

611

612 (A) The Shannon index of gut microbiota was lower in IBD patients than in healthy  
613 controls, and was not significantly improved 3 days after FMT (p-value > 0.01).  
614 Different groups are represented by different colored boxes.

615 (B) The proportion of species gained from the donor in post-FMT recipients lasts  
616 during follow-up visits. However, the proportions varied among recipients, even  
617 those who shared a donor (labels with the same color). Gut microbiota composition  
618 per patient was divided into four parts: orange represented donor-specific species,  
619 yellow represented species shared by donor and recipient, purple represented  
620 recipient-specific species and green represented newly gained species.

621

622 **Figure 3. High compositional resemblance of the gut microbiomes of post-FMT**  
623 **recipients and their pre-status, as well as post-FMT recipients and their donors.**

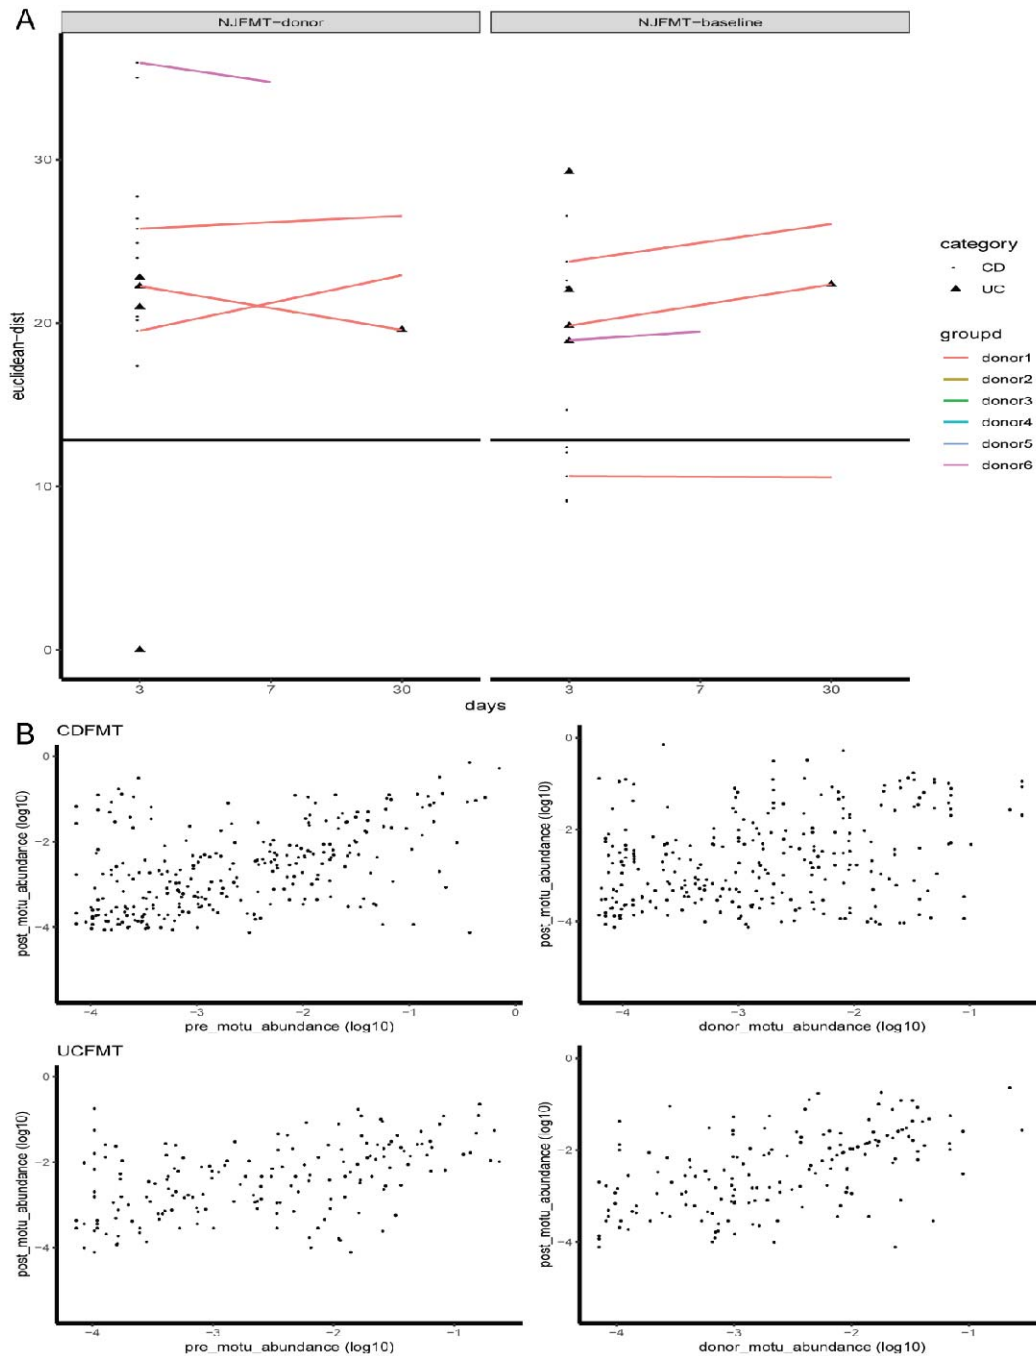

624

625 (A) After FMT, the microbiota composition of most patients is further from their initial  
626 status than natural shift observed in placebo (solid black line). Additionally,  
627 recipients with the same donor (lines of the same color) may vary in their shifting  
628 tendency.

629 (B) High consistency (median cosine similarity > 0.9) is found between post-FMT IBD  
630 patients (3 days after treatment) with their pre-FMT status, as well as with their  
631 donors.

632

633 **Figure 4. UC recipients display higher strain level variations than CD recipients 3**

634 **days after FMT treatment.**

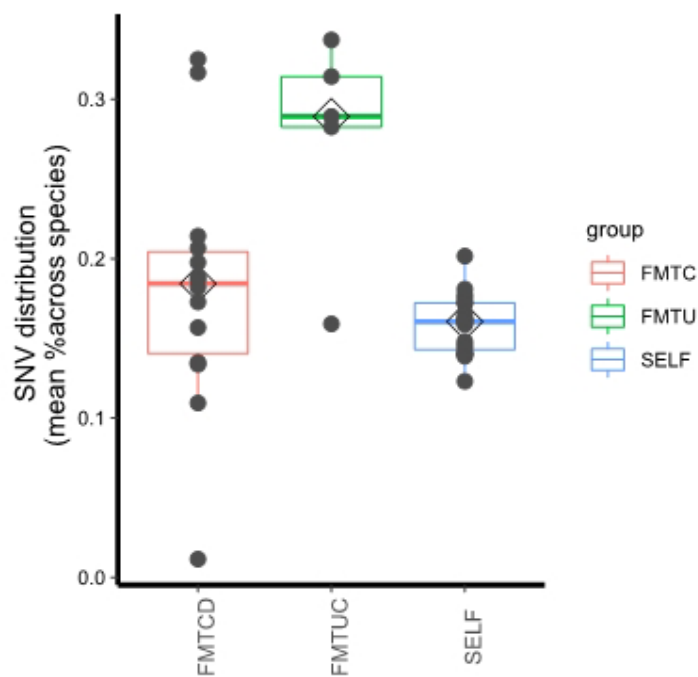

635

636 Single-site allelic variations of UC and CD recipients after FMT treatment are a bit  
637 higher than autologous FMT recipients (p-value = 0.148 and 0.234, respectively).

638 Single-site allelic variations of UC recipients are significantly higher than CD  
639 recipients after FMT treatment (p-value = 0.00056).

640

641 **Figure 5. Some donor-specific strains undergo transfer, and the existence of donor**



642 strains are highest 3 days after FMT.

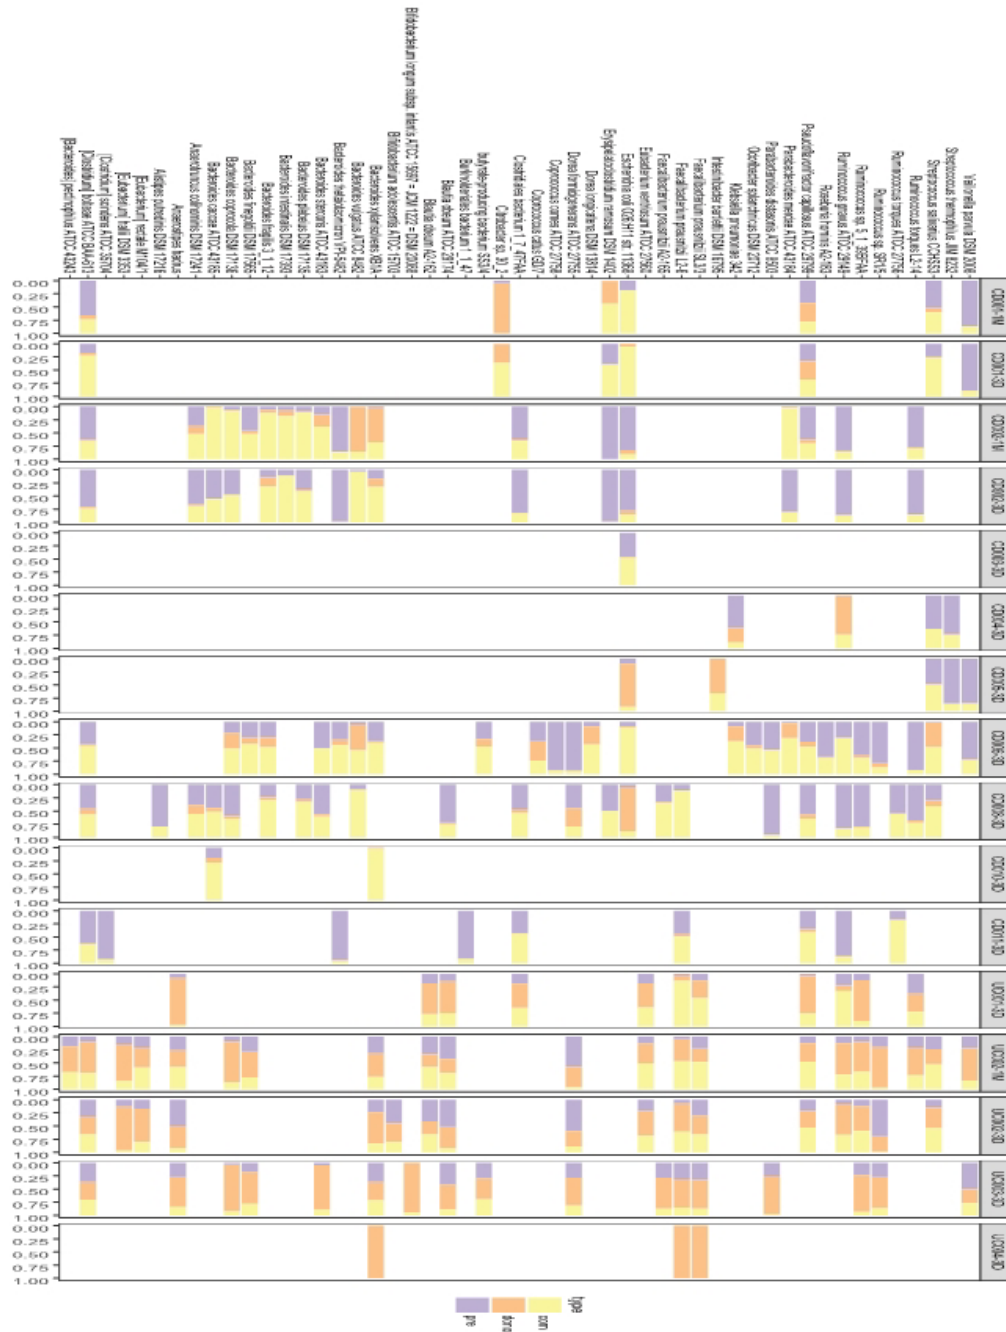

643

644 The rate of donor strain transfer is greatest in recipients 3 days after FMT (UC: 62.8

645  $\pm 25.3\%$ , CD:  $11.4 \pm 10.3\%$ ), and a portion of them persists in recipients 1 month later

646 (UC: 46.9%, CD:  $19.99 \pm 10.1\%$ ). Proportions of donor- and recipient-specific strains

647 across 50 species are shown in orange and purple, respectively.

648

649 **Figure 6. Random forest models have the ability to predict the gut microbiota**

650 **composition of post-FMT patients.**

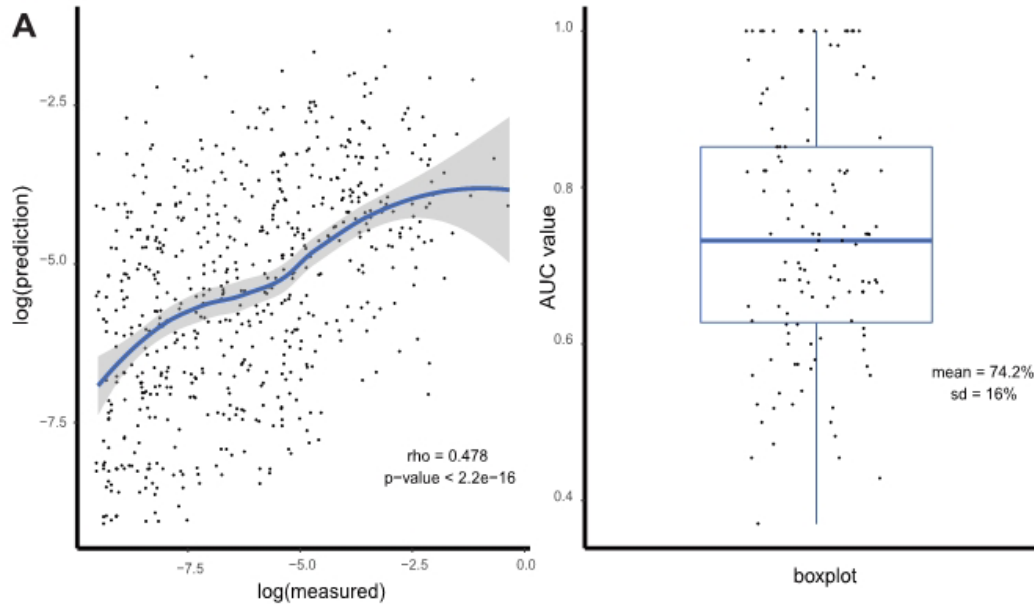

**B**

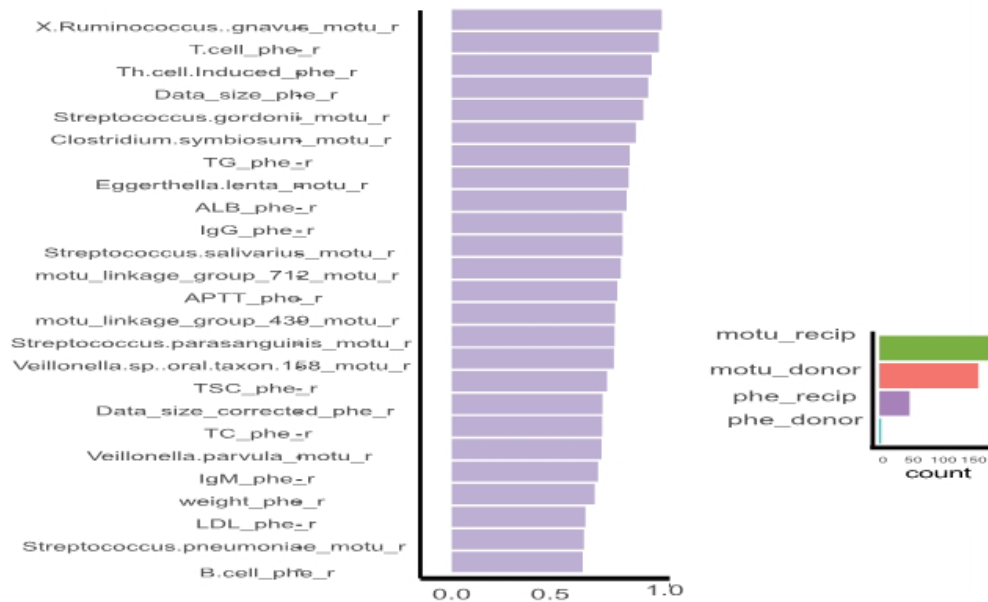

651

652 (A) Left panel shows the classification result: predicted values have a moderate  
653 consistency with true values ( $\rho = 0.478$  and  $p\text{-value} < 2.2e-16$ ). Right panel  
654 shows the regression result: a boxplot of all the AUC values of each mOTU in  
655 post-FMT recipients (median AUC value = 74.2%, SD = 16%).

656 (B) Important variables are computed across those models, defined as those with an  
657 AUC value greater than 0.90. Important variables are divided into different  
658 categories (represented by different colors). The top 25 variables are classified as  
659 the clinical parameters of recipients.

660

661 **Figure 7. Some clinical indexes of IBD recipients have significantly changed 3**  
662 **days after FMT, and several clinical indexes correlated with changes in the**  
663 **mOTUs profiles of recipients.**

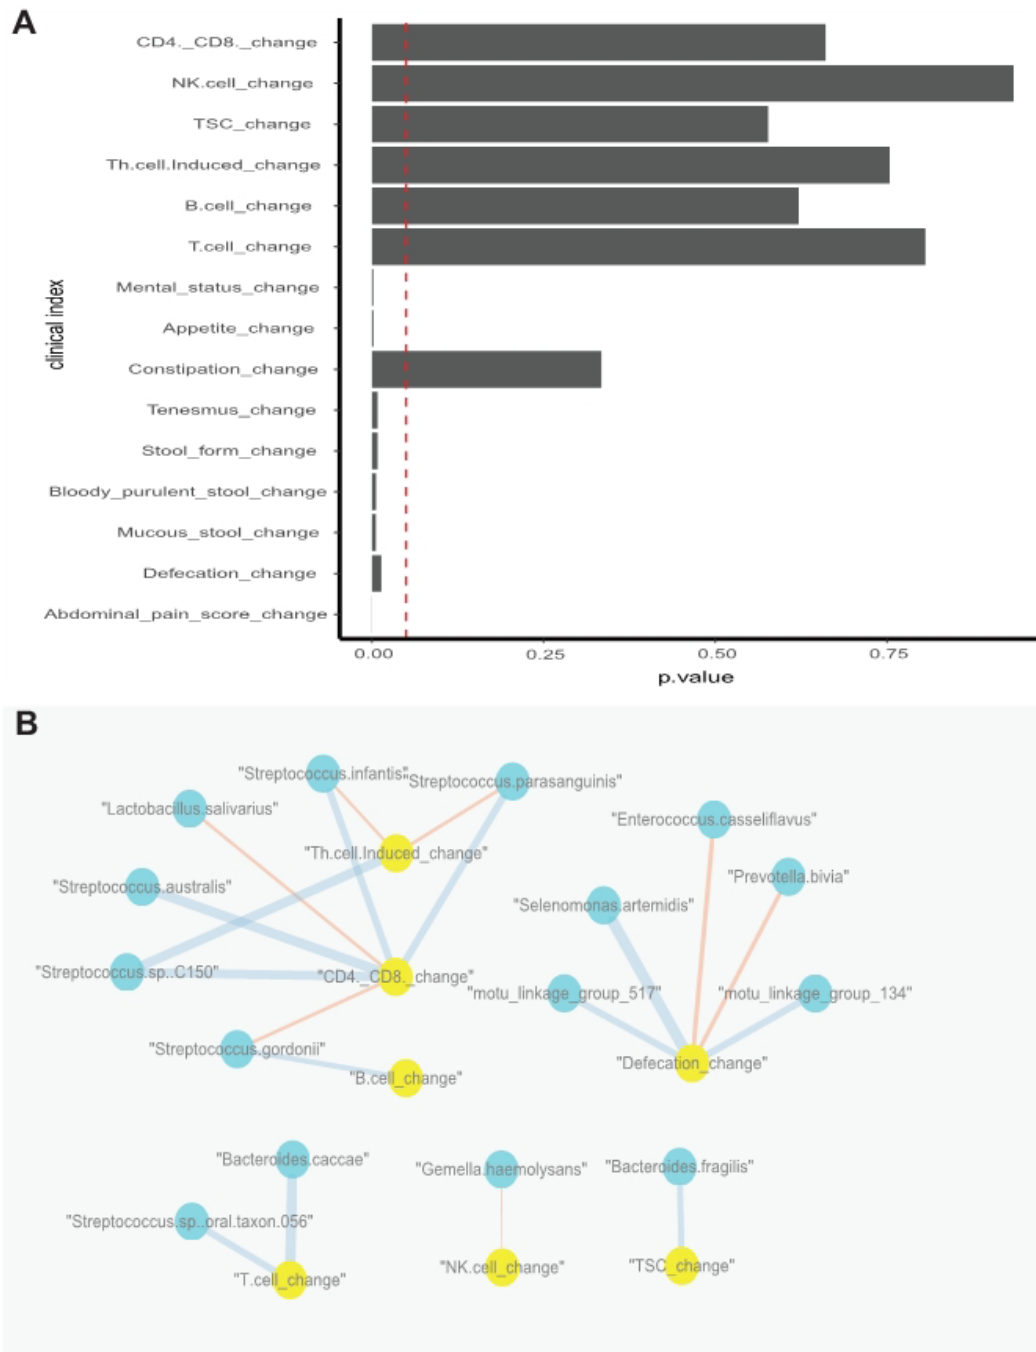

664

665 (A) Mental status, appetite, tenesmus, etc. significantly changed 3 days after FMT

666 (p-value < 0.05). Vertical dotted line indicates a p value of 0.05.

667 (B) Defecation changes and CD4+CD8+ changes have relationships with several

668 mOTUs. Blue represents a significant positive correlation, while red indicates a

669 significant negative correlation ( $p$ -value  $< 0.01$ ). The width of the lines indicates  
670 the weight of correlation.

671

672 **Figure S1. The amount of donor-specific species gain after FMT differs, even for**  
673 **same-donor recipients.**

674 Recipients that share a donor are colored the same.

675

676 **Figure S2. A certain number of donor species display apparent transfer after FMT**  
677 **treatment in IBD patients.**

678 Heatmap and hierarchical clustering of mOTU profiles for all samples. Pre- and  
679 post-FMT CD recipients, pre- and post-FMT UC recipients, and healthy controls are  
680 separated by space.

681

682

683

684

685
